# Supplementary material for: Comparative transcriptome analysis of isonuclear-alloplasmic lines unmask key transcription factor genes and metabolic pathways involved in sterility of maize CMS-C
Source: PubMed Central journal article supplement (PMC5452966; doi:10.7717/peerj.3408), 2017-05-30
Supplement: peerj-05-3408-s006.pdf [file peerj-05-3408-s006.pdf]

**Table S2. Statistics of the 453 DEGs**

| GeneID    | Relative expression |         | Log <sub>2</sub> (MS-C/MS-N) | Padj        | Differential expression model | P value     |
|-----------|---------------------|---------|------------------------------|-------------|-------------------------------|-------------|
|           | level               |         |                              |             |                               |             |
|           | MS-C                | MS-N    |                              |             |                               |             |
| 103652814 | 36.63               | 3.40    | 3.43                         | 2.96059E-09 | Up                            | 2.13199E-11 |
| 103636474 | 85.42               | 10.14   | 3.07                         | 7.955E-15   | Up                            | 3.00069E-17 |
| 100275282 | 165.80              | 22.08   | 2.91                         | 1.04642E-17 | Up                            | 2.96037E-20 |
| 100276638 | 928.93              | 165.88  | 2.49                         | 0.002415825 | Up                            | 6.10963E-05 |
| 103635063 | 58.94               | 11.33   | 2.38                         | 5.86629E-07 | Up                            | 6.08523E-09 |
| 103626943 | 24.39               | 4.83    | 2.34                         | 0.001537877 | Up                            | 3.59486E-05 |
| 103646792 | 181.68              | 36.41   | 2.32                         | 1.23128E-07 | Up                            | 1.11538E-09 |
| 100280082 | 26.84               | 5.40    | 2.31                         | 0.000255537 | Up                            | 4.59315E-06 |
| 103647886 | 5.99                | 1.27    | 2.23                         | 0.014384873 | Up                            | 0.000524521 |
| 100286852 | 20.93               | 5.21    | 2.01                         | 0.009224497 | Up                            | 0.000301297 |
| 100277644 | 13.01               | 3.29    | 1.98                         | 0.013289989 | Up                            | 0.000477382 |
| 100275312 | 10.96               | 2.80    | 1.97                         | 0.029119372 | Up                            | 0.00129645  |
| 100381631 | 199.34              | 52.62   | 1.92                         | 2.36229E-07 | Up                            | 2.23951E-09 |
| 103651407 | 17.13               | 4.70    | 1.87                         | 0.011687565 | Up                            | 0.000406129 |
| 542525    | 35.53               | 9.82    | 1.85                         | 0.000997556 | Up                            | 2.13799E-05 |
| 100191593 | 16.56               | 4.58    | 1.85                         | 0.022644149 | Up                            | 0.000945394 |
| 100282577 | 62.82               | 17.74   | 1.82                         | 0.000852673 | Up                            | 1.77556E-05 |
| 542671    | 17.21               | 5.32    | 1.69                         | 0.02400853  | Up                            | 0.001010589 |
| 103653588 | 16.94               | 5.25    | 1.69                         | 0.043584469 | Up                            | 0.002213225 |
| 100274322 | 57.74               | 18.25   | 1.66                         | 0.000271008 | Up                            | 4.93318E-06 |
| 100285804 | 83.58               | 27.03   | 1.63                         | 1.4991E-06  | Up                            | 1.68784E-08 |
| 100282243 | 178.00              | 59.15   | 1.59                         | 2.66321E-07 | Up                            | 2.54951E-09 |
| 100273345 | 23.88               | 8.10    | 1.56                         | 0.018213257 | Up                            | 0.000712521 |
| 100282076 | 229.12              | 78.34   | 1.55                         | 2.36229E-07 | Up                            | 2.24118E-09 |
| 100272880 | 114.05              | 39.20   | 1.54                         | 0.000105834 | Up                            | 1.72993E-06 |
| 103647433 | 203.74              | 71.90   | 1.50                         | 1.27379E-08 | Up                            | 9.79168E-11 |
| 100276273 | 183.24              | 64.98   | 1.50                         | 8.398E-08   | Up                            | 7.4155E-10  |
| 100283620 | 111.77              | 39.87   | 1.49                         | 2.76289E-07 | Up                            | 2.66073E-09 |
| 103646319 | 430.58              | 155.19  | 1.47                         | 1.72664E-08 | Up                            | 1.37661E-10 |
| 100278708 | 56.21               | 20.29   | 1.47                         | 0.002772904 | Up                            | 7.17117E-05 |
| 103647908 | 83.91               | 31.98   | 1.39                         | 0.008608539 | Up                            | 0.000277734 |
| 100281437 | 41.32               | 15.82   | 1.39                         | 0.027947812 | Up                            | 0.001229116 |
| 103633355 | 62.78               | 24.10   | 1.38                         | 0.00448819  | Up                            | 0.000127743 |
| 100282067 | 178.87              | 68.68   | 1.38                         | 1.16226E-05 | Up                            | 1.55438E-07 |
| 100192351 | 99.95               | 38.76   | 1.37                         | 0.000130672 | Up                            | 2.18446E-06 |
| 100194314 | 30.47               | 11.90   | 1.36                         | 0.029977862 | Up                            | 0.001352859 |
| 100279427 | 122.54              | 47.99   | 1.35                         | 0.002280336 | Up                            | 5.70833E-05 |
| 100283208 | 3798.37             | 1496.95 | 1.34                         | 7.00155E-08 | Up                            | 6.1024E-10  |
| 100192349 | 860.63              | 341.48  | 1.33                         | 1.91008E-09 | Up                            | 1.33729E-11 |
| 100283978 | 183.43              | 73.33   | 1.32                         | 0.007440729 | Up                            | 0.000233041 |
| 100216857 | 55.59               | 22.30   | 1.32                         | 0.011860871 | Up                            | 0.000414185 |
| 100502492 | 197.91              | 81.04   | 1.29                         | 1.02177E-05 | Up                            | 1.3548E-07  |
| 100191778 | 113.87              | 46.81   | 1.28                         | 2.0075E-05  | Up                            | 2.7995E-07  |
| 103629798 | 37.56               | 15.47   | 1.28                         | 0.034596245 | Up                            | 0.00164212  |
| 103638141 | 78.93               | 32.72   | 1.27                         | 0.015468146 | Up                            | 0.000577724 |
| 103653067 | 86.88               | 36.23   | 1.26                         | 0.00121393  | Up                            | 2.67804E-05 |
| 542252    | 317.26              | 132.61  | 1.26                         | 7.10903E-08 | Up                            | 6.21639E-10 |
| 103630336 | 92.10               | 40.50   | 1.19                         | 0.038482564 | Up                            | 0.001892567 |

|           |         |         |       |             |      |             |
|-----------|---------|---------|-------|-------------|------|-------------|
| 103650987 | 32.65   | 14.44   | 1.18  | 0.039851788 | Up   | 0.001981655 |
| 100285871 | 179.87  | 80.19   | 1.17  | 0.00517106  | Up   | 0.000152055 |
| 103644166 | 81.84   | 36.55   | 1.16  | 0.019420643 | Up   | 0.000776959 |
| 100279991 | 114.68  | 51.24   | 1.16  | 0.000182496 | Up   | 3.17597E-06 |
| 100279695 | 52.90   | 23.70   | 1.16  | 0.018490652 | Up   | 0.000726543 |
| 100285138 | 197.49  | 88.92   | 1.15  | 1.17197E-05 | Up   | 1.57741E-07 |
| 100501166 | 126.95  | 57.36   | 1.15  | 2.20678E-05 | Up   | 3.09633E-07 |
| 100272878 | 75.36   | 34.29   | 1.14  | 0.001147197 | Up   | 2.5046E-05  |
| 100282473 | 316.54  | 145.97  | 1.12  | 6.91396E-09 | Up   | 5.19623E-11 |
| 100280121 | 125.95  | 58.49   | 1.11  | 0.000100906 | Up   | 1.63693E-06 |
| 100282311 | 735.82  | 346.57  | 1.09  | 1.10673E-10 | Up   | 6.57829E-13 |
| 100285064 | 906.62  | 430.14  | 1.08  | 0.00012137  | Up   | 2.01161E-06 |
| 100194091 | 44.67   | 21.39   | 1.06  | 0.03519029  | Up   | 0.001682834 |
| 103633426 | 392.48  | 188.75  | 1.06  | 6.52717E-06 | Up   | 8.2816E-08  |
| 103637861 | 258.94  | 124.57  | 1.06  | 1.01076E-05 | Up   | 1.33557E-07 |
| 100383937 | 60.89   | 29.73   | 1.03  | 0.013083521 | Up   | 0.000468096 |
| 100194192 | 478.62  | 235.76  | 1.02  | 2.19586E-06 | Up   | 2.57029E-08 |
| 100274575 | 101.40  | 50.47   | 1.01  | 0.014440655 | Up   | 0.000527381 |
| 100383538 | 187.61  | 93.63   | 1.00  | 0.004041607 | Up   | 0.00011226  |
| 100284795 | 1023.69 | 511.55  | 1.00  | 0.001257846 | Up   | 2.79649E-05 |
| 100856910 | 259.83  | 522.35  | -1.01 | 0.002246371 | Down | 5.57196E-05 |
| 103652932 | 45.51   | 93.12   | -1.03 | 0.002247765 | Down | 5.58184E-05 |
| 103632651 | 37.03   | 75.83   | -1.03 | 0.014170603 | Down | 0.000514684 |
| 100280875 | 80.74   | 165.81  | -1.04 | 0.023060114 | Down | 0.000966055 |
| 100283585 | 1452.66 | 3000.85 | -1.05 | 3.45134E-19 | Down | 8.99394E-22 |
| 100384255 | 69.23   | 143.05  | -1.05 | 0.004572964 | Down | 0.000130809 |
| 100304404 | 498.75  | 1042.42 | -1.06 | 0.000107395 | Down | 1.75851E-06 |
| 100283790 | 176.32  | 369.93  | -1.07 | 5.57475E-07 | Down | 5.75094E-09 |
| 103629543 | 204.07  | 431.04  | -1.08 | 0.001168743 | Down | 2.56166E-05 |
| 100281466 | 318.46  | 679.75  | -1.09 | 2.59026E-15 | Down | 9.17851E-18 |
| 542220    | 499.33  | 1070.99 | -1.10 | 2.61741E-08 | Down | 2.14665E-10 |
| 100283406 | 55.74   | 119.85  | -1.10 | 0.000122191 | Down | 2.03221E-06 |
| 103644012 | 32.87   | 70.70   | -1.11 | 0.014513252 | Down | 0.000530861 |
| 100280212 | 137.72  | 296.61  | -1.11 | 1.27924E-09 | Down | 8.84653E-12 |
| 103640855 | 217.28  | 468.30  | -1.11 | 0.004380572 | Down | 0.000124047 |
| 100276266 | 172.23  | 371.87  | -1.11 | 0.010319568 | Down | 0.000345617 |
| 103627764 | 337.15  | 728.89  | -1.11 | 5.1574E-05  | Down | 7.88481E-07 |
| 100502532 | 121.01  | 261.65  | -1.11 | 0.011083241 | Down | 0.000382279 |
| 100274678 | 158.99  | 344.34  | -1.11 | 0.000152915 | Down | 2.60001E-06 |
| 100217290 | 45.96   | 99.63   | -1.12 | 0.006100884 | Down | 0.000184278 |
| 100283422 | 71.43   | 156.25  | -1.13 | 9.83442E-05 | Down | 1.58783E-06 |
| 103648097 | 312.51  | 688.33  | -1.14 | 1.33879E-05 | Down | 1.82489E-07 |
| 100283424 | 475.70  | 1057.77 | -1.15 | 0.000944709 | Down | 2.00043E-05 |
| 103633153 | 466.89  | 1043.69 | -1.16 | 2.91363E-08 | Down | 2.42289E-10 |
| 103639025 | 27.13   | 61.34   | -1.18 | 0.033657063 | Down | 0.001585039 |
| 100274509 | 132.19  | 299.08  | -1.18 | 1.16916E-06 | Down | 1.27627E-08 |
| 103649813 | 51.60   | 117.74  | -1.19 | 0.012924627 | Down | 0.000460196 |
| 100284770 | 278.48  | 637.64  | -1.20 | 3.16679E-10 | Down | 1.99994E-12 |
| 100191895 | 85.21   | 197.49  | -1.21 | 0.000338232 | Down | 6.2538E-06  |
| 100191302 | 217.86  | 505.14  | -1.21 | 3.043E-07   | Down | 2.96526E-09 |
| 100501509 | 28.59   | 66.47   | -1.22 | 0.002477482 | Down | 6.30096E-05 |
| 100283348 | 656.40  | 1529.20 | -1.22 | 6.86811E-11 | Down | 3.94493E-13 |
| 100279917 | 379.77  | 885.50  | -1.22 | 7.81777E-05 | Down | 1.23319E-06 |
| 103644989 | 14.52   | 33.91   | -1.22 | 0.0289154   | Down | 0.001280759 |

|           |         |         |       |             |      |             |
|-----------|---------|---------|-------|-------------|------|-------------|
| 100280377 | 24.17   | 56.57   | -1.23 | 0.020054634 | Down | 0.000815504 |
| 100277891 | 109.69  | 256.95  | -1.23 | 0.006960274 | Down | 0.000216203 |
| 100277253 | 741.20  | 1755.20 | -1.24 | 3.13355E-06 | Down | 3.79672E-08 |
| 103626829 | 45.00   | 106.68  | -1.25 | 2.90543E-05 | Down | 4.16793E-07 |
| 100275160 | 16.60   | 39.38   | -1.25 | 0.025928421 | Down | 0.001117726 |
| 541892    | 1783.90 | 4234.08 | -1.25 | 1.00113E-35 | Down | 8.29654E-39 |
| 100281758 | 31.34   | 74.49   | -1.25 | 0.00049633  | Down | 9.63046E-06 |
| 100281686 | 238.46  | 566.97  | -1.25 | 0.00116539  | Down | 2.55098E-05 |
| 103638712 | 65.44   | 155.74  | -1.25 | 0.000135876 | Down | 2.2831E-06  |
| 103649729 | 155.79  | 373.20  | -1.26 | 3.89608E-05 | Down | 5.71152E-07 |
| 103626492 | 69.86   | 168.02  | -1.27 | 2.26826E-07 | Down | 2.13902E-09 |
| 100278237 | 97.50   | 234.79  | -1.27 | 0.002032162 | Down | 4.9419E-05  |
| 100279842 | 17.25   | 41.57   | -1.27 | 0.020606897 | Down | 0.000843261 |
| 100126914 | 160.54  | 387.25  | -1.27 | 4.49911E-06 | Down | 5.55415E-08 |
| 100280406 | 66.84   | 161.29  | -1.27 | 0.000177566 | Down | 3.06514E-06 |
| 103630789 | 31.92   | 77.37   | -1.28 | 0.001683592 | Down | 3.98839E-05 |
| 100274363 | 215.16  | 521.88  | -1.28 | 0.001919298 | Down | 4.61807E-05 |
| 100276564 | 428.13  | 1049.26 | -1.29 | 6.11209E-21 | Down | 1.37982E-23 |
| 100280133 | 221.87  | 551.10  | -1.31 | 2.82323E-05 | Down | 4.02581E-07 |
| 100279260 | 55.03   | 136.75  | -1.31 | 0.002107061 | Down | 5.16731E-05 |
| 100274330 | 2268.97 | 5639.82 | -1.31 | 1.21256E-11 | Down | 6.27174E-14 |
| 103644988 | 31.34   | 78.38   | -1.32 | 6.19158E-05 | Down | 9.56507E-07 |
| 103647971 | 95.77   | 239.83  | -1.32 | 0.002907063 | Down | 7.61781E-05 |
| 100273615 | 81.13   | 205.52  | -1.34 | 0.003577549 | Down | 9.69171E-05 |
| 100382805 | 542.42  | 1381.63 | -1.35 | 1.3276E-06  | Down | 1.4682E-08  |
| 100500995 | 15.35   | 39.33   | -1.36 | 0.011017044 | Down | 0.000377162 |
| 100191429 | 645.87  | 1659.44 | -1.36 | 0.011066574 | Down | 0.000380721 |
| 100501502 | 14.65   | 37.69   | -1.36 | 0.030346451 | Down | 0.001379699 |
| 100382938 | 116.90  | 303.89  | -1.38 | 0.000306511 | Down | 5.62326E-06 |
| 103650464 | 32.47   | 84.42   | -1.38 | 0.002254342 | Down | 5.61753E-05 |
| 100275584 | 92.92   | 242.33  | -1.38 | 0.002258098 | Down | 5.63976E-05 |
| 103641871 | 73.44   | 191.69  | -1.38 | 1.18395E-05 | Down | 1.60241E-07 |
| 103647718 | 25.60   | 67.08   | -1.39 | 0.010774783 | Down | 0.000365174 |
| 103635762 | 278.70  | 731.29  | -1.39 | 4.02778E-10 | Down | 2.60124E-12 |
| 100191873 | 10.48   | 27.49   | -1.39 | 0.024011354 | Down | 0.001011394 |
| 103639307 | 89.01   | 233.82  | -1.39 | 2.93963E-07 | Down | 2.85613E-09 |
| 100193190 | 130.00  | 341.52  | -1.39 | 1.93328E-11 | Down | 1.011E-13   |
| 100193686 | 144.87  | 381.35  | -1.40 | 1.18395E-05 | Down | 1.60368E-07 |
| 100384222 | 175.71  | 463.25  | -1.40 | 0.000345597 | Down | 6.42921E-06 |
| 100273243 | 547.50  | 1445.83 | -1.40 | 1.96704E-07 | Down | 1.84372E-09 |
| 103638587 | 193.00  | 510.83  | -1.40 | 2.92375E-05 | Down | 4.21093E-07 |
| 100193545 | 15.67   | 41.53   | -1.41 | 0.017474369 | Down | 0.000675625 |
| 100192940 | 10.85   | 28.85   | -1.41 | 0.020327103 | Down | 0.000828907 |
| 100384577 | 121.36  | 323.73  | -1.42 | 1.84014E-06 | Down | 2.09811E-08 |
| 100280135 | 15.83   | 42.38   | -1.42 | 0.019876425 | Down | 0.000805417 |
| 103641797 | 10.80   | 28.96   | -1.42 | 0.041070945 | Down | 0.002062115 |
| 100286157 | 21.69   | 58.59   | -1.43 | 0.002707992 | Down | 6.9646E-05  |
| 100274081 | 716.20  | 1941.29 | -1.44 | 1.64287E-16 | Down | 5.07031E-19 |
| 100191808 | 45.01   | 122.12  | -1.44 | 2.19586E-06 | Down | 2.57174E-08 |
| 103650442 | 28.27   | 76.85   | -1.44 | 0.001016773 | Down | 2.18789E-05 |
| 100285001 | 96.81   | 264.73  | -1.45 | 0.000218883 | Down | 3.87802E-06 |
| 100125643 | 28.04   | 76.73   | -1.45 | 4.51475E-05 | Down | 6.74858E-07 |
| 103636483 | 23.69   | 65.14   | -1.46 | 0.027588805 | Down | 0.001208513 |
| 100278599 | 14.47   | 39.84   | -1.46 | 0.02945448  | Down | 0.001316733 |

|           |          |          |       |             |      |             |
|-----------|----------|----------|-------|-------------|------|-------------|
| 100285416 | 617.13   | 1704.32  | -1.47 | 4.17419E-12 | Down | 2.03974E-14 |
| 100278114 | 12.57    | 34.89    | -1.47 | 0.010219256 | Down | 0.000341382 |
| 100273763 | 513.02   | 1424.06  | -1.47 | 0.016138985 | Down | 0.000610158 |
| 100274815 | 34.20    | 95.04    | -1.47 | 0.001627951 | Down | 3.81936E-05 |
| 100279222 | 154.11   | 431.45   | -1.49 | 0.037054919 | Down | 0.001800119 |
| 103654228 | 40.63    | 113.94   | -1.49 | 1.13344E-06 | Down | 1.23081E-08 |
| 100283909 | 130.68   | 367.17   | -1.49 | 2.08056E-08 | Down | 1.68257E-10 |
| 100275623 | 56.54    | 159.40   | -1.50 | 3.32839E-05 | Down | 4.84126E-07 |
| 100283205 | 19425.24 | 54902.15 | -1.50 | 0.002252592 | Down | 5.60026E-05 |
| 100283568 | 126.94   | 358.97   | -1.50 | 5.36915E-08 | Down | 4.61826E-10 |
| 100191290 | 37.21    | 105.51   | -1.50 | 0.001951846 | Down | 4.73543E-05 |
| 100382699 | 31.29    | 88.77    | -1.50 | 0.002841871 | Down | 7.38201E-05 |
| 103640212 | 9.54     | 27.09    | -1.51 | 0.030139182 | Down | 0.001368543 |
| 103632953 | 26.97    | 76.66    | -1.51 | 0.003297712 | Down | 8.76399E-05 |
| 100216656 | 76.03    | 217.04   | -1.51 | 3.09736E-05 | Down | 4.48752E-07 |
| 100283628 | 49.93    | 143.40   | -1.52 | 8.4422E-06  | Down | 1.09044E-07 |
| 100281682 | 212.96   | 612.03   | -1.52 | 0.018154928 | Down | 0.00070972  |
| 103626591 | 45.50    | 132.67   | -1.54 | 1.65888E-07 | Down | 1.53698E-09 |
| 100282962 | 89.17    | 266.19   | -1.58 | 1.32853E-08 | Down | 1.02504E-10 |
| 103654812 | 274.46   | 827.13   | -1.59 | 4.41154E-23 | Down | 7.81606E-26 |
| 100280331 | 87.63    | 265.07   | -1.60 | 1.67634E-08 | Down | 1.33172E-10 |
| 103653111 | 55.25    | 167.30   | -1.60 | 0.001310144 | Down | 2.9502E-05  |
| 100382783 | 13.31    | 40.32    | -1.60 | 0.006539243 | Down | 0.000200509 |
| 103633417 | 38.91    | 118.12   | -1.60 | 8.79093E-06 | Down | 1.14553E-07 |
| 100284471 | 30.93    | 93.92    | -1.60 | 0.00091848  | Down | 1.93701E-05 |
| 100191923 | 304.23   | 925.61   | -1.61 | 4.93234E-08 | Down | 4.21435E-10 |
| 100274597 | 17.85    | 54.41    | -1.61 | 0.033266324 | Down | 0.001556274 |
| 100276550 | 50.63    | 154.44   | -1.61 | 0.001854083 | Down | 4.43467E-05 |
| 103626306 | 6.49     | 19.87    | -1.62 | 0.044863707 | Down | 0.002302322 |
| 100037816 | 27.86    | 85.45    | -1.62 | 0.000515124 | Down | 1.00834E-05 |
| 100217237 | 79.02    | 245.53   | -1.64 | 1.06504E-05 | Down | 1.41522E-07 |
| 542314    | 61.69    | 195.99   | -1.67 | 6.7684E-10  | Down | 4.48725E-12 |
| 103654924 | 103.15   | 330.54   | -1.68 | 6.14397E-06 | Down | 7.76028E-08 |
| 542246    | 5.13     | 16.45    | -1.68 | 0.043237494 | Down | 0.002189428 |
| 100284041 | 91.43    | 294.97   | -1.69 | 1.1769E-05  | Down | 1.5874E-07  |
| 103640897 | 7.46     | 24.08    | -1.69 | 0.031389261 | Down | 0.00144236  |
| 103626181 | 19.63    | 64.61    | -1.72 | 0.000103551 | Down | 1.6867E-06  |
| 100193178 | 185.59   | 614.33   | -1.73 | 4.25643E-09 | Down | 3.10165E-11 |
| 103645841 | 54.80    | 183.27   | -1.74 | 0.000445507 | Down | 8.51701E-06 |
| 100279948 | 2681.30  | 8995.99  | -1.75 | 1.62148E-11 | Down | 8.43314E-14 |
| 100284356 | 9.34     | 31.58    | -1.76 | 0.004159723 | Down | 0.000116136 |
| 103646269 | 23.53    | 79.70    | -1.76 | 0.010809845 | Down | 0.000366671 |
| 103626248 | 8.37     | 28.60    | -1.77 | 0.005241095 | Down | 0.000154264 |
| 100381544 | 6.11     | 20.96    | -1.78 | 0.014340788 | Down | 0.000522504 |
| 100280210 | 24.19    | 83.88    | -1.79 | 2.73585E-05 | Down | 3.89339E-07 |
| 100284225 | 6.96     | 24.15    | -1.80 | 0.005938985 | Down | 0.000178879 |
| 103636839 | 16.56    | 57.54    | -1.80 | 2.31314E-05 | Down | 3.25217E-07 |
| 103638848 | 7.56     | 26.38    | -1.80 | 0.008781638 | Down | 0.000284726 |
| 100384311 | 11.13    | 39.12    | -1.81 | 0.001882215 | Down | 4.51809E-05 |
| 100278059 | 9.77     | 34.48    | -1.82 | 0.010875366 | Down | 0.00037138  |
| 542365    | 2943.70  | 10399.91 | -1.82 | 3.01106E-25 | Down | 4.81852E-28 |
| 103651392 | 145.69   | 517.16   | -1.83 | 3.20215E-10 | Down | 2.04058E-12 |
| 100280347 | 14.68    | 52.27    | -1.83 | 0.002036413 | Down | 4.95806E-05 |
| 103639813 | 4.00     | 14.33    | -1.84 | 0.048867408 | Down | 0.00254573  |

|           |         |          |       |             |      |             |
|-----------|---------|----------|-------|-------------|------|-------------|
| 100501494 | 280.85  | 1008.10  | -1.84 | 8.28494E-24 | Down | 1.42052E-26 |
| 100501908 | 96.12   | 346.53   | -1.85 | 6.81087E-16 | Down | 2.31609E-18 |
| 103627817 | 96.55   | 348.35   | -1.85 | 8.19373E-14 | Down | 3.3483E-16  |
| 103626550 | 9.96    | 36.19    | -1.86 | 0.000746575 | Down | 1.53394E-05 |
| 100382211 | 7.02    | 25.62    | -1.87 | 0.01547433  | Down | 0.000578422 |
| 103638086 | 8.85    | 32.90    | -1.90 | 0.004898611 | Down | 0.000142364 |
| 100281771 | 3.26    | 12.17    | -1.90 | 0.030457839 | Down | 0.001386504 |
| 100283091 | 187.67  | 702.04   | -1.90 | 4.33796E-34 | Down | 4.09078E-37 |
| 100282936 | 134.39  | 503.21   | -1.90 | 0.0011324   | Down | 2.46582E-05 |
| 100279849 | 12.50   | 47.30    | -1.92 | 0.00372392  | Down | 0.00010184  |
| 100285935 | 22.34   | 84.88    | -1.93 | 4.25301E-08 | Down | 3.62176E-10 |
| 103634688 | 4.08    | 15.57    | -1.93 | 0.031812238 | Down | 0.001467703 |
| 100284722 | 16.06   | 61.29    | -1.93 | 4.76285E-05 | Down | 7.18633E-07 |
| 100194100 | 4.10    | 15.82    | -1.95 | 0.010592088 | Down | 0.000356561 |
| 100275115 | 31.10   | 120.31   | -1.95 | 3.78935E-10 | Down | 2.43643E-12 |
| 103638134 | 1686.65 | 6536.89  | -1.95 | 0.001358042 | Down | 3.08522E-05 |
| 100279833 | 4.20    | 16.33    | -1.96 | 0.011877782 | Down | 0.000415115 |
| 103635831 | 8.19    | 31.84    | -1.96 | 0.001330314 | Down | 3.01083E-05 |
| 100383497 | 52.31   | 203.53   | -1.96 | 0.044671642 | Down | 0.002281788 |
| 100501649 | 961.80  | 3750.56  | -1.96 | 0.001534647 | Down | 3.58292E-05 |
| 100381989 | 6.90    | 26.90    | -1.96 | 0.006115296 | Down | 0.000184888 |
| 103651202 | 2.24    | 8.76     | -1.97 | 0.034596245 | Down | 0.00164127  |
| 103654021 | 1.28    | 5.02     | -1.98 | 0.041762539 | Down | 0.002101613 |
| 103636179 | 5.14    | 20.29    | -1.98 | 0.004648916 | Down | 0.000133247 |
| 103647431 | 257.13  | 1016.73  | -1.98 | 7.75806E-05 | Down | 1.21933E-06 |
| 100383632 | 216.62  | 857.69   | -1.99 | 3.98051E-11 | Down | 2.22947E-13 |
| 103638032 | 1.61    | 6.38     | -1.99 | 0.039857206 | Down | 0.001985229 |
| 100284273 | 22.22   | 88.53    | -1.99 | 8.56726E-07 | Down | 9.13182E-09 |
| 100272793 | 5721.17 | 22823.55 | -2.00 | 0.035954243 | Down | 0.001732264 |
| 100281107 | 56.71   | 227.77   | -2.01 | 0.010596501 | Down | 0.000357613 |
| 100193098 | 25.79   | 103.90   | -2.01 | 3.25538E-06 | Down | 3.95364E-08 |
| 103654972 | 73.34   | 295.81   | -2.01 | 2.37383E-09 | Down | 1.69589E-11 |
| 103635615 | 2.07    | 8.35     | -2.01 | 0.033906642 | Down | 0.001601637 |
| 103633134 | 4.45    | 18.00    | -2.02 | 0.010715072 | Down | 0.000362232 |
| 103627039 | 10.34   | 41.96    | -2.02 | 0.002102114 | Down | 5.14806E-05 |
| 100384270 | 128.54  | 522.40   | -2.02 | 9.66461E-11 | Down | 5.68929E-13 |
| 103633084 | 25.28   | 102.85   | -2.02 | 1.39239E-06 | Down | 1.54383E-08 |
| 100280206 | 76.07   | 309.82   | -2.03 | 1.60673E-08 | Down | 1.26724E-10 |
| 100382108 | 313.23  | 1278.85  | -2.03 | 2.14713E-11 | Down | 1.14738E-13 |
| 103628553 | 33.18   | 135.60   | -2.03 | 2.65125E-05 | Down | 3.76541E-07 |
| 103633344 | 1.16    | 4.76     | -2.03 | 0.033833128 | Down | 0.001594468 |
| 100502310 | 17.02   | 69.72    | -2.03 | 2.72179E-06 | Down | 3.25893E-08 |
| 103633013 | 40.15   | 165.18   | -2.04 | 2.67017E-08 | Down | 2.20518E-10 |
| 103647851 | 1.22    | 5.02     | -2.04 | 0.032448906 | Down | 0.001505887 |
| 103640584 | 5.36    | 22.18    | -2.05 | 0.004110837 | Down | 0.000114463 |
| 100127513 | 1.56    | 6.50     | -2.06 | 0.030139182 | Down | 0.001367042 |
| 103648597 | 1.20    | 5.04     | -2.07 | 0.02945448  | Down | 0.001317965 |
| 100273547 | 5.72    | 24.04    | -2.07 | 0.002763188 | Down | 7.12235E-05 |
| 100216764 | 6.15    | 25.98    | -2.08 | 0.005364773 | Down | 0.000158518 |
| 103639404 | 1.53    | 6.45     | -2.08 | 0.027085735 | Down | 0.001180367 |
| 103638045 | 1.85    | 7.82     | -2.08 | 0.022838013 | Down | 0.000955445 |
| 103627899 | 6.24    | 26.57    | -2.09 | 0.005137564 | Down | 0.00015074  |
| 100381369 | 64.93   | 276.53   | -2.09 | 0.00167012  | Down | 3.94693E-05 |
| 103632719 | 46.54   | 198.85   | -2.10 | 0.024417179 | Down | 0.001038257 |

|           |          |          |       |             |      |             |
|-----------|----------|----------|-------|-------------|------|-------------|
| 100857063 | 158.09   | 676.71   | -2.10 | 1.45128E-26 | Down | 2.07362E-29 |
| 100191179 | 1587.09  | 6810.27  | -2.10 | 0.000692105 | Down | 1.40423E-05 |
| 100502386 | 1.89     | 8.16     | -2.11 | 0.020007904 | Down | 0.00081246  |
| 103627992 | 98.64    | 426.05   | -2.11 | 1.33851E-17 | Down | 3.82498E-20 |
| 100382901 | 59.98    | 260.43   | -2.12 | 3.83686E-07 | Down | 3.80462E-09 |
| 100274548 | 1193.63  | 5215.95  | -2.13 | 1.85355E-35 | Down | 1.58903E-38 |
| 100284426 | 30.73    | 135.37   | -2.14 | 2.90543E-05 | Down | 4.16254E-07 |
| 100276698 | 11.25    | 50.03    | -2.15 | 2.09612E-06 | Down | 2.42593E-08 |
| 100384123 | 4.62     | 20.96    | -2.18 | 0.003884003 | Down | 0.00010755  |
| 103649305 | 1.37     | 6.26     | -2.19 | 0.01770274  | Down | 0.000685972 |
| 100277639 | 110.19   | 502.38   | -2.19 | 2.14485E-10 | Down | 1.31778E-12 |
| 100282648 | 449.69   | 2069.70  | -2.20 | 3.45134E-19 | Down | 9.07365E-22 |
| 100284326 | 16.62    | 76.50    | -2.20 | 1.102E-09   | Down | 7.55786E-12 |
| 541796    | 803.10   | 3751.96  | -2.22 | 6.41499E-26 | Down | 9.8991E-29  |
| 103626422 | 11.18    | 52.31    | -2.23 | 0.00020437  | Down | 3.58586E-06 |
| 103640165 | 66.05    | 309.39   | -2.23 | 2.61115E-16 | Down | 8.3571E-19  |
| 100274135 | 272.88   | 1284.71  | -2.24 | 7.98812E-05 | Down | 1.26234E-06 |
| 103632322 | 1.94     | 9.16     | -2.24 | 0.014207903 | Down | 0.000516444 |
| 103640604 | 42.58    | 204.08   | -2.26 | 9.74572E-07 | Down | 1.04715E-08 |
| 100277514 | 39.38    | 188.78   | -2.26 | 6.98768E-11 | Down | 4.03358E-13 |
| 100381397 | 90.71    | 436.13   | -2.27 | 1.26695E-13 | Down | 5.24968E-16 |
| 103634448 | 15.10    | 72.62    | -2.27 | 0.000177568 | Down | 3.07499E-06 |
| 103641486 | 3.73     | 18.23    | -2.29 | 0.001951846 | Down | 4.72905E-05 |
| 100284244 | 11204.54 | 54719.46 | -2.29 | 3.15109E-07 | Down | 3.07959E-09 |
| 103628094 | 42.09    | 207.40   | -2.30 | 2.41998E-13 | Down | 1.04423E-15 |
| 103627046 | 2.82     | 13.90    | -2.30 | 0.009312146 | Down | 0.000306023 |
| 100282922 | 410.12   | 2025.57  | -2.30 | 0.00614717  | Down | 0.000186557 |
| 103641948 | 1.29     | 6.39     | -2.30 | 0.010386627 | Down | 0.00034816  |
| 103650488 | 7.48     | 37.01    | -2.31 | 0.000640945 | Down | 1.28394E-05 |
| 100277154 | 4543.55  | 22522.20 | -2.31 | 0.008975083 | Down | 0.000292381 |
| 100285734 | 311.71   | 1549.91  | -2.31 | 1.49205E-06 | Down | 1.67564E-08 |
| 103655639 | 21.96    | 109.80   | -2.32 | 1.35825E-12 | Down | 6.32664E-15 |
| 103631929 | 1.56     | 7.89     | -2.33 | 0.008956597 | Down | 0.000291523 |
| 103646489 | 26.84    | 135.98   | -2.34 | 4.3132E-09  | Down | 3.16766E-11 |
| 100382074 | 144.37   | 736.48   | -2.35 | 5.88011E-23 | Down | 1.0586E-25  |
| 100283024 | 144.13   | 735.94   | -2.35 | 0.000475946 | Down | 9.16693E-06 |
| 100192720 | 41.54    | 215.26   | -2.37 | 3.96306E-12 | Down | 1.92334E-14 |
| 103647062 | 1.34     | 7.02     | -2.39 | 0.006792182 | Down | 0.0002104   |
| 100501255 | 16.77    | 88.34    | -2.40 | 8.95529E-08 | Down | 7.93319E-10 |
| 103653109 | 19.06    | 101.02   | -2.41 | 3.94682E-07 | Down | 3.97006E-09 |
| 103632695 | 82.03    | 436.90   | -2.41 | 8.74414E-05 | Down | 1.39575E-06 |
| 103630380 | 1.90     | 10.19    | -2.42 | 0.005773481 | Down | 0.000172574 |
| 100382027 | 1.76     | 9.47     | -2.43 | 0.005478781 | Down | 0.000162513 |
| 103653694 | 13.82    | 75.05    | -2.44 | 5.30133E-08 | Down | 4.54477E-10 |
| 103630813 | 19.24    | 104.64   | -2.44 | 1.07424E-10 | Down | 6.35442E-13 |
| 100384495 | 52.41    | 285.45   | -2.45 | 2.27473E-12 | Down | 1.07906E-14 |
| 100383488 | 598.54   | 3282.53  | -2.46 | 0.004808629 | Down | 0.000139249 |
| 103632429 | 1.29     | 7.06     | -2.46 | 0.004653857 | Down | 0.000133655 |
| 103641576 | 4.50     | 24.77    | -2.46 | 4.60452E-05 | Down | 6.92112E-07 |
| 100191633 | 80.07    | 442.19   | -2.47 | 0.000400622 | Down | 7.54443E-06 |
| 103646464 | 1888.50  | 10501.49 | -2.48 | 1.43388E-20 | Down | 3.40093E-23 |
| 103644206 | 1.37     | 7.65     | -2.48 | 0.004165891 | Down | 0.000116784 |
| 100285183 | 323.41   | 1806.12  | -2.48 | 4.73567E-06 | Down | 5.9003E-08  |
| 100283944 | 1342.83  | 7594.24  | -2.50 | 2.02291E-21 | Down | 4.2524E-24  |

|           |         |          |       |             |      |             |
|-----------|---------|----------|-------|-------------|------|-------------|
| 100272754 | 467.70  | 2652.15  | -2.50 | 4.66317E-06 | Down | 5.79665E-08 |
| 100216895 | 30.21   | 171.37   | -2.50 | 0.003729073 | Down | 0.000102088 |
| 100384599 | 16.91   | 96.06    | -2.51 | 1.44104E-05 | Down | 1.98074E-07 |
| 100216674 | 41.06   | 238.84   | -2.54 | 3.35081E-17 | Down | 9.95839E-20 |
| 100282997 | 1120.95 | 6549.54  | -2.55 | 0.001937197 | Down | 4.66752E-05 |
| 100283948 | 22.11   | 130.24   | -2.56 | 4.3221E-16  | Down | 1.42036E-18 |
| 100282312 | 59.61   | 351.08   | -2.56 | 0.00276787  | Down | 7.15024E-05 |
| 100273315 | 533.29  | 3162.40  | -2.57 | 0.000181846 | Down | 3.15427E-06 |
| 100192694 | 95.72   | 572.16   | -2.58 | 2.19247E-13 | Down | 9.33526E-16 |
| 100286341 | 3.21    | 19.17    | -2.58 | 0.000852673 | Down | 1.7763E-05  |
| 100281998 | 23.10   | 138.86   | -2.59 | 0.000529676 | Down | 1.03986E-05 |
| 103651071 | 47.50   | 286.10   | -2.59 | 5.70017E-10 | Down | 3.71389E-12 |
| 103626380 | 3.97    | 24.14    | -2.60 | 0.000389279 | Down | 7.28633E-06 |
| 103640901 | 23.53   | 143.91   | -2.61 | 8.12058E-20 | Down | 2.0421E-22  |
| 100279722 | 89.25   | 553.48   | -2.63 | 9.06475E-19 | Down | 2.40905E-21 |
| 103652002 | 113.46  | 705.24   | -2.64 | 5.26037E-06 | Down | 6.59913E-08 |
| 103655673 | 2.58    | 16.08    | -2.64 | 0.001704142 | Down | 4.04681E-05 |
| 103647839 | 87.02   | 555.17   | -2.67 | 1.9999E-28  | Down | 2.51459E-31 |
| 100192502 | 19.08   | 122.06   | -2.68 | 7.56939E-12 | Down | 3.80698E-14 |
| 103647067 | 1.46    | 9.37     | -2.68 | 0.001246929 | Down | 2.76644E-05 |
| 100192014 | 241.31  | 1554.87  | -2.69 | 1.11565E-45 | Down | 5.73861E-49 |
| 100276850 | 26.06   | 173.27   | -2.73 | 9.89399E-22 | Down | 1.97914E-24 |
| 100502513 | 505.82  | 3511.29  | -2.80 | 1.10719E-06 | Down | 1.19914E-08 |
| 100272346 | 8.27    | 57.47    | -2.80 | 6.88141E-06 | Down | 8.77038E-08 |
| 103633275 | 20.64   | 151.22   | -2.87 | 5.17911E-13 | Down | 2.3532E-15  |
| 100283569 | 9.46    | 70.19    | -2.89 | 1.33601E-08 | Down | 1.03463E-10 |
| 100193580 | 154.12  | 1146.04  | -2.89 | 3.0365E-27  | Down | 4.25183E-30 |
| 100192089 | 700.44  | 5212.58  | -2.90 | 4.26514E-05 | Down | 6.30129E-07 |
| 103653730 | 187.43  | 1419.17  | -2.92 | 1.59198E-06 | Down | 1.80152E-08 |
| 103656021 | 1.97    | 15.66    | -2.99 | 8.49915E-05 | Down | 1.34795E-06 |
| 100383387 | 267.98  | 2214.85  | -3.05 | 3.93812E-07 | Down | 3.95005E-09 |
| 542359    | 348.45  | 2965.40  | -3.09 | 1.43565E-06 | Down | 1.6E-08     |
| 100280292 | 940.51  | 8283.94  | -3.14 | 9.5492E-08  | Down | 8.51389E-10 |
| 103640356 | 8.39    | 75.88    | -3.18 | 2.9974E-08  | Down | 2.50112E-10 |
| 103632480 | 12.90   | 116.69   | -3.18 | 5.05533E-05 | Down | 7.65652E-07 |
| 100383994 | 4.73    | 42.78    | -3.18 | 2.38076E-06 | Down | 2.81658E-08 |
| 100279802 | 12.46   | 114.98   | -3.21 | 5.59222E-18 | Down | 1.55011E-20 |
| 103639542 | 2460.79 | 22776.61 | -3.21 | 8.5009E-06  | Down | 1.10045E-07 |
| 103631726 | 5.94    | 55.44    | -3.22 | 2.33023E-09 | Down | 1.65141E-11 |
| 100501544 | 1807.06 | 17656.28 | -3.29 | 3.78827E-06 | Down | 4.64414E-08 |
| 100283735 | 230.86  | 2262.55  | -3.29 | 5.82813E-09 | Down | 4.34687E-11 |
| 100216685 | 119.40  | 1178.53  | -3.30 | 6.96698E-33 | Down | 6.76908E-36 |
| 103630156 | 22.54   | 224.35   | -3.32 | 1.7066E-06  | Down | 1.93977E-08 |
| 100191963 | 206.71  | 2080.27  | -3.33 | 1.39394E-05 | Down | 1.91201E-07 |
| 100384001 | 176.79  | 1780.24  | -3.33 | 1.43133E-63 | Down | 4.09022E-67 |
| 100285344 | 50.35   | 516.40   | -3.36 | 1.22975E-61 | Down | 3.8656E-65  |
| 100191756 | 111.78  | 1152.90  | -3.37 | 3.5698E-41  | Down | 2.14225E-44 |
| 103639541 | 80.57   | 831.31   | -3.37 | 4.90161E-26 | Down | 7.28364E-29 |
| 100283366 | 413.10  | 4265.18  | -3.37 | 1.09332E-05 | Down | 1.45592E-07 |
| 100282284 | 1.94    | 20.14    | -3.37 | 5.62993E-06 | Down | 7.09493E-08 |
| 103635020 | 11.27   | 117.90   | -3.39 | 1.12625E-14 | Down | 4.31268E-17 |
| 100304091 | 17.69   | 185.51   | -3.39 | 9.86216E-18 | Down | 2.76188E-20 |
| 103644321 | 1.89    | 20.05    | -3.40 | 1.17272E-06 | Down | 1.28351E-08 |
| 542430    | 18.17   | 195.38   | -3.43 | 9.29617E-14 | Down | 3.82536E-16 |

|           |        |         |       |             |      |             |
|-----------|--------|---------|-------|-------------|------|-------------|
| 100191933 | 382.78 | 4188.58 | -3.45 | 3.02541E-15 | Down | 1.10662E-17 |
| 100273383 | 53.20  | 594.30  | -3.48 | 4.25994E-09 | Down | 3.11638E-11 |
| 100191699 | 21.09  | 239.56  | -3.51 | 2.62207E-07 | Down | 2.50263E-09 |
| 103649544 | 3.20   | 36.91   | -3.53 | 1.67634E-08 | Down | 1.32914E-10 |
| 100273256 | 252.03 | 2905.32 | -3.53 | 3.70711E-07 | Down | 3.64419E-09 |
| 100273983 | 300.48 | 3516.60 | -3.55 | 4.23798E-15 | Down | 1.58649E-17 |
| 100382213 | 52.67  | 620.58  | -3.56 | 1.99192E-08 | Down | 1.60519E-10 |
| 103654474 | 12.27  | 145.56  | -3.57 | 2.71863E-15 | Down | 9.78875E-18 |
| 100284872 | 10.04  | 120.04  | -3.58 | 2.75058E-14 | Down | 1.0847E-16  |
| 100384494 | 2.16   | 27.07   | -3.65 | 3.90914E-07 | Down | 3.90981E-09 |
| 100276545 | 24.51  | 311.60  | -3.67 | 5.05175E-09 | Down | 3.73894E-11 |
| 100192059 | 91.42  | 1169.38 | -3.68 | 1.31435E-10 | Down | 7.92503E-13 |
| 103630103 | 24.78  | 331.49  | -3.74 | 3.85912E-07 | Down | 3.84876E-09 |
| 100501856 | 27.43  | 368.65  | -3.75 | 7.25297E-11 | Down | 4.20744E-13 |
| 100276688 | 5.30   | 72.27   | -3.77 | 1.53167E-13 | Down | 6.43413E-16 |
| 103638322 | 1.67   | 23.47   | -3.82 | 3.55467E-08 | Down | 3.00675E-10 |
| 100383822 | 198.02 | 2832.41 | -3.84 | 8.12748E-11 | Down | 4.7612E-13  |
| 103654037 | 1.92   | 27.58   | -3.84 | 4.23955E-09 | Down | 3.07723E-11 |
| 103637588 | 3.29   | 47.83   | -3.86 | 1.08771E-09 | Down | 7.39773E-12 |
| 100383186 | 4.00   | 60.36   | -3.92 | 3.66568E-10 | Down | 2.34644E-12 |
| 732739    | 75.37  | 1154.62 | -3.94 | 4.74253E-18 | Down | 1.30103E-20 |
| 103646079 | 2.25   | 34.44   | -3.94 | 2.32423E-09 | Down | 1.64053E-11 |
| 100276718 | 33.91  | 533.00  | -3.97 | 3.42552E-11 | Down | 1.89904E-13 |
| 100277380 | 34.60  | 548.76  | -3.99 | 6.64982E-64 | Down | 1.71025E-67 |
| 103641988 | 2.68   | 43.89   | -4.04 | 1.25452E-09 | Down | 8.63975E-12 |
| 100274544 | 16.32  | 269.68  | -4.05 | 1.11567E-24 | Down | 1.81726E-27 |
| 103637524 | 3.53   | 58.49   | -4.05 | 6.69565E-10 | Down | 4.41989E-12 |
| 100274206 | 4.26   | 70.74   | -4.05 | 4.8722E-13  | Down | 2.19983E-15 |
| 100274857 | 7.24   | 121.14  | -4.07 | 1.55425E-12 | Down | 7.28401E-15 |
| 100277429 | 9.64   | 164.03  | -4.09 | 1.35573E-17 | Down | 3.91291E-20 |
| 103633099 | 14.84  | 252.89  | -4.09 | 2.3387E-09  | Down | 1.6641E-11  |
| 100501125 | 10.16  | 177.66  | -4.13 | 7.31598E-26 | Down | 1.14985E-28 |
| 103642123 | 5.66   | 99.22   | -4.13 | 3.36525E-21 | Down | 7.37174E-24 |
| 100285881 | 22.09  | 403.88  | -4.19 | 2.58987E-11 | Down | 1.40617E-13 |
| 100279867 | 108.92 | 2077.16 | -4.25 | 1.62E-202   | Down | 4.6294E-207 |
| 100273778 | 12.90  | 255.67  | -4.31 | 2.35552E-22 | Down | 4.57722E-25 |
| 103632851 | 2.29   | 45.51   | -4.31 | 7.84429E-12 | Down | 3.99007E-14 |
| 103636283 | 1.70   | 34.21   | -4.33 | 2.58987E-11 | Down | 1.40171E-13 |
| 103629791 | 1.89   | 40.00   | -4.40 | 1.18369E-11 | Down | 6.0886E-14  |
| 103654996 | 17.22  | 367.26  | -4.41 | 1.17684E-49 | Down | 5.38077E-53 |
| 103644300 | 16.86  | 366.10  | -4.44 | 1.43613E-57 | Down | 5.74551E-61 |
| 103639989 | 2.34   | 51.46   | -4.46 | 6.90508E-13 | Down | 3.15715E-15 |
| 100382499 | 65.56  | 1444.57 | -4.46 | 7.46482E-66 | Down | 1.49322E-69 |
| 103630514 | 6.00   | 132.30  | -4.46 | 1.02643E-27 | Down | 1.34925E-30 |
| 100501307 | 2.38   | 55.42   | -4.54 | 3.26644E-12 | Down | 1.55883E-14 |
| 100276889 | 13.68  | 334.44  | -4.61 | 2.10382E-11 | Down | 1.11221E-13 |
| 100383808 | 14.41  | 354.13  | -4.62 | 2.44067E-13 | Down | 1.06013E-15 |
| 100383090 | 43.32  | 1113.70 | -4.68 | 1.29483E-16 | Down | 3.95917E-19 |
| 100274602 | 48.39  | 1294.16 | -4.74 | 3.69282E-15 | Down | 1.3613E-17  |
| 100279365 | 2.35   | 66.64   | -4.83 | 2.2368E-14  | Down | 8.75697E-17 |
| 103653182 | 6.06   | 173.34  | -4.84 | 5.56978E-30 | Down | 6.36655E-33 |
| 100284209 | 4.44   | 135.27  | -4.93 | 3.25731E-18 | Down | 8.7497E-21  |
| 100382026 | 4.96   | 157.90  | -4.99 | 3.36525E-21 | Down | 7.40481E-24 |
| 100283756 | 17.33  | 560.89  | -5.02 | 2.26843E-16 | Down | 7.06574E-19 |



|           |        |          |       |             |      |             |
|-----------|--------|----------|-------|-------------|------|-------------|
| 100279509 | 28.26  | 930.43   | -5.04 | 1.07716E-22 | Down | 2.00079E-25 |
| 100284097 | 20.63  | 685.42   | -5.05 | 4.92648E-14 | Down | 1.97093E-16 |
| 100277247 | 187.83 | 6396.28  | -5.09 | 2.96349E-90 | Down | 1.69372E-94 |
| 103639382 | 5.37   | 198.96   | -5.21 | 1.6085E-30  | Down | 1.74667E-33 |
| 100283407 | 12.64  | 492.66   | -5.28 | 3.89719E-18 | Down | 1.05799E-20 |
| 100501546 | 153.18 | 6065.96  | -5.31 | 2.85681E-26 | Down | 4.16349E-29 |
| 100279972 | 77.28  | 3084.87  | -5.32 | 3.97964E-29 | Down | 4.77639E-32 |
| 103628940 | 5.93   | 261.50   | -5.46 | 5.559E-35   | Down | 5.08339E-38 |
| 100283034 | 16.54  | 807.50   | -5.61 | 3.67766E-69 | Down | 6.30564E-73 |
| 542761    | 5.49   | 300.04   | -5.77 | 5.66097E-30 | Down | 6.63256E-33 |
| 103643917 | 2.36   | 132.76   | -5.81 | 6.16797E-24 | Down | 1.03992E-26 |
| 103640085 | 43.10  | 2526.49  | -5.87 | 1.1824E-21  | Down | 2.399E-24   |
| 100383115 | 316.24 | 20193.11 | -6.00 | 1.69054E-23 | Down | 2.94688E-26 |
| 100276192 | 29.01  | 1870.15  | -6.01 | 1.8213E-31  | Down | 1.9257E-34  |
| 103637446 | 2.14   | 143.75   | -6.07 | 1.10207E-27 | Down | 1.48017E-30 |
| 100282493 | 25.26  | 1718.40  | -6.09 | 6.16754E-26 | Down | 9.34103E-29 |
| 100282491 | 262.82 | 20543.66 | -6.29 | 2.52286E-27 | Down | 3.46052E-30 |
| 103646055 | 28.91  | 2559.80  | -6.47 | 7.37075E-28 | Down | 9.4783E-31  |
| 100191623 | 49.96  | 6137.31  | -6.94 | 4.09258E-58 | Down | 1.52036E-61 |
| 100274426 | 18.47  | 2292.44  | -6.96 | 3.24332E-32 | Down | 3.24387E-35 |
| 100286025 | 41.64  | 5924.89  | -7.15 | 3.54835E-39 | Down | 2.41093E-42 |
| 103643621 | 3.43   | 502.93   | -7.20 | 1.16528E-49 | Down | 4.99492E-53 |
| 100502093 | 5.17   | 807.61   | -7.29 | 2.93366E-44 | Down | 1.59283E-47 |
| 103648444 | 7.37   | 1579.30  | -7.74 | 2.80627E-59 | Down | 9.62316E-63 |
| 100272446 | 2.72   | 769.96   | -8.15 | 1.70432E-70 | Down | 2.43515E-74 |
| 103655377 | 4.47   | 1551.66  | -8.44 | 9.78004E-78 | Down | 8.38433E-82 |
| 100191533 | 6.07   | 2141.97  | -8.46 | 1.30806E-64 | Down | 2.99037E-68 |

---
